# Supplementary material
Source: Springer Nature journal article supplement (https://www.springermedizin.de/resource/supplementary/12936_2004_116_MOESM1_ESM.pdf/9546904)

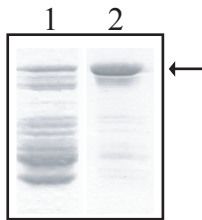

GST-DBL1 $\alpha$   
FCR3S1.2

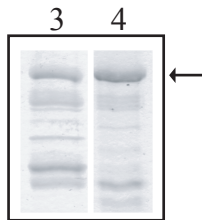

GST-DBL1 $\alpha$   
TM284S2

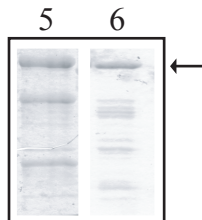

GST-DBL2 $\beta$   
TM284S2

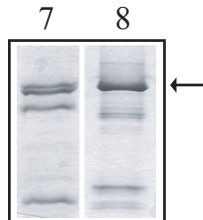

GST-CIDR1 $\alpha$   
FCR3S1.2

Supplement: MOESM1 [file 9546904]
